# Supplementary material
Source: MDPI journal article supplement (https://www.mdpi.com/2227-7390/10/14/2482)
Supplement: s1 [file s1]

Archive with 1 entries (1 files):
- mathematics-1791203-supplementary.pdf
